# Supplementary material for: Combination treatment of berberine and solid lipid curcumin particles increased cell death and inhibited PI3K/Akt/mTOR pathway of human cultured glioblastoma cells more effectively than did individual treatments
Source: PubMed Central journal article supplement (PMC6913937; doi:10.1371/journal.pone.0225660), 2019-12-16

Fig 5: DNA gel image: The genomic DNA was extracted by QIAmp-DNA Mini Kit (Qiagen) and run with 3% agarose gel

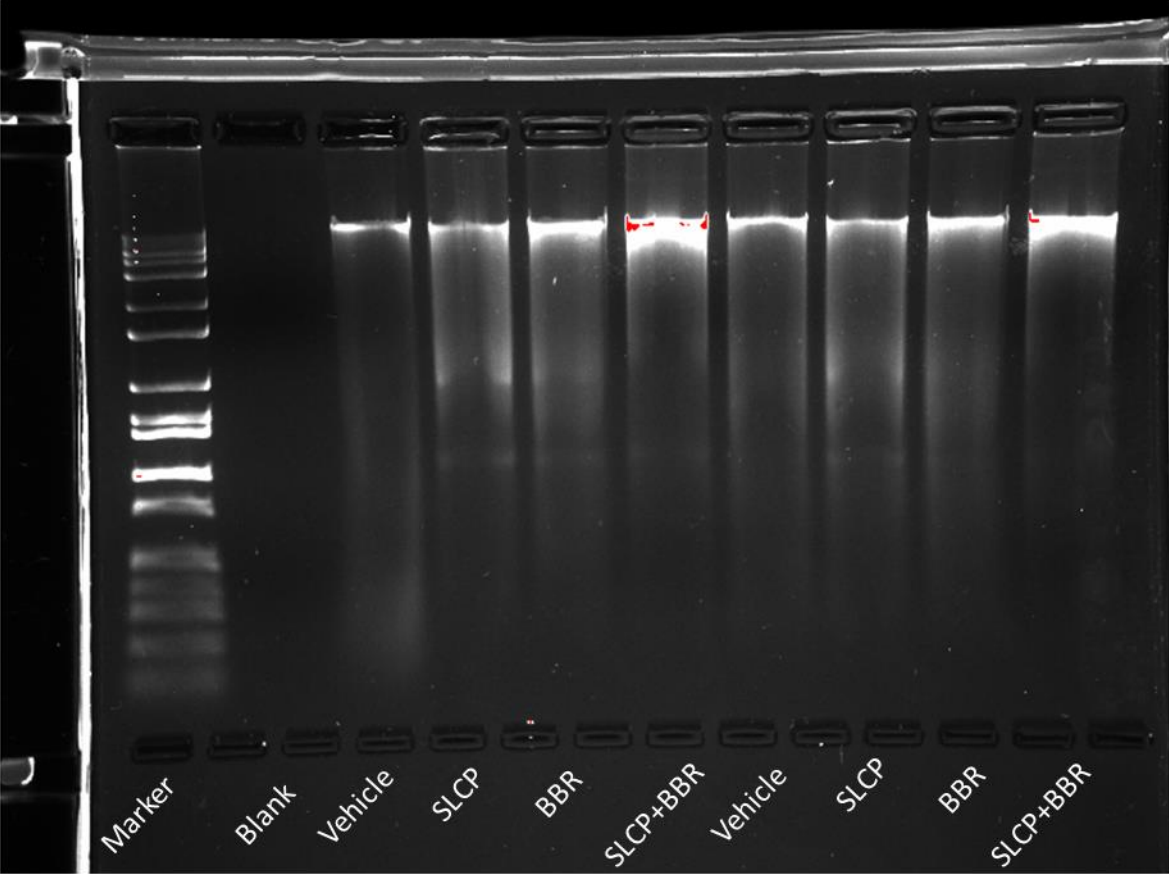

Fig 8A: Western blot of Bax

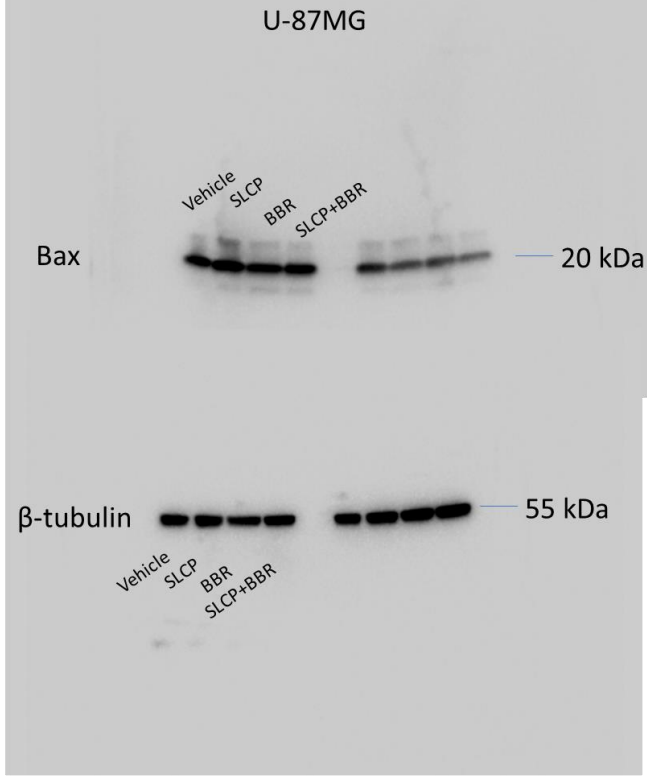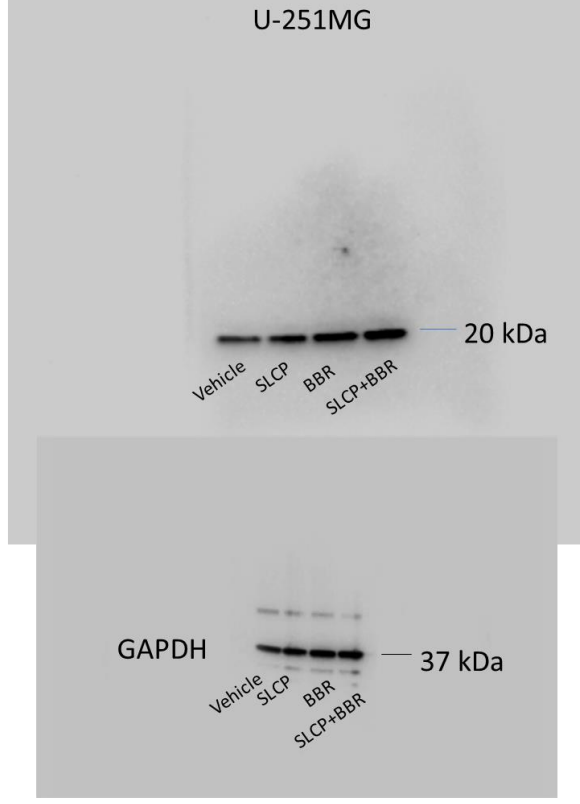

Fig 8A: Western blot of Bcl2

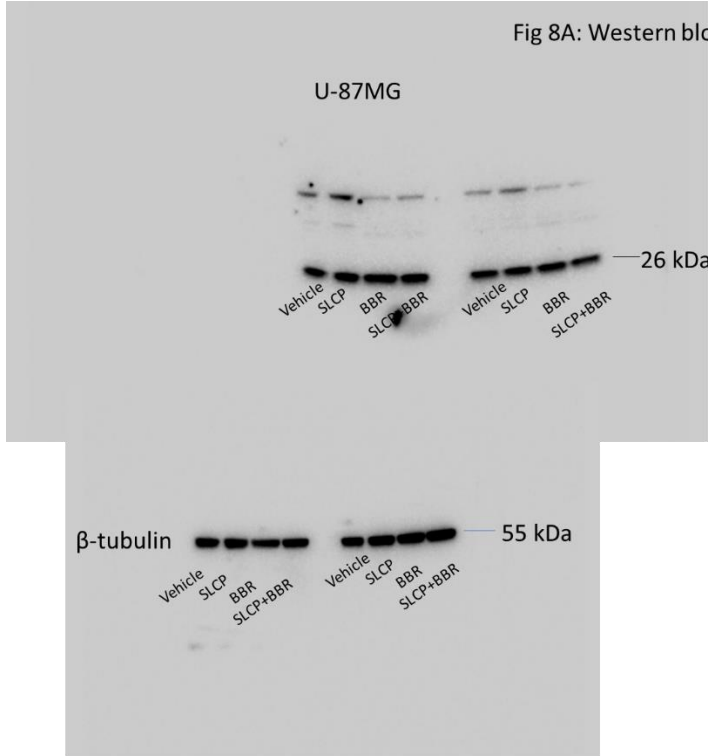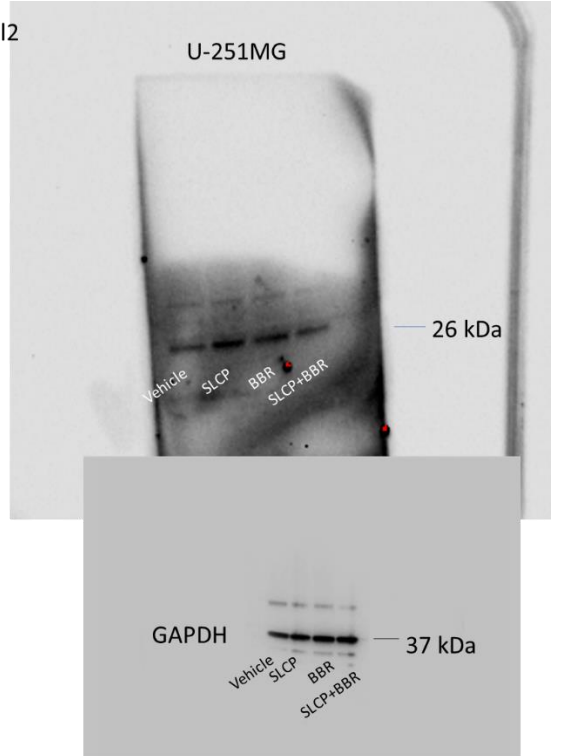

Fig 8A: Western blot of Cyt-C

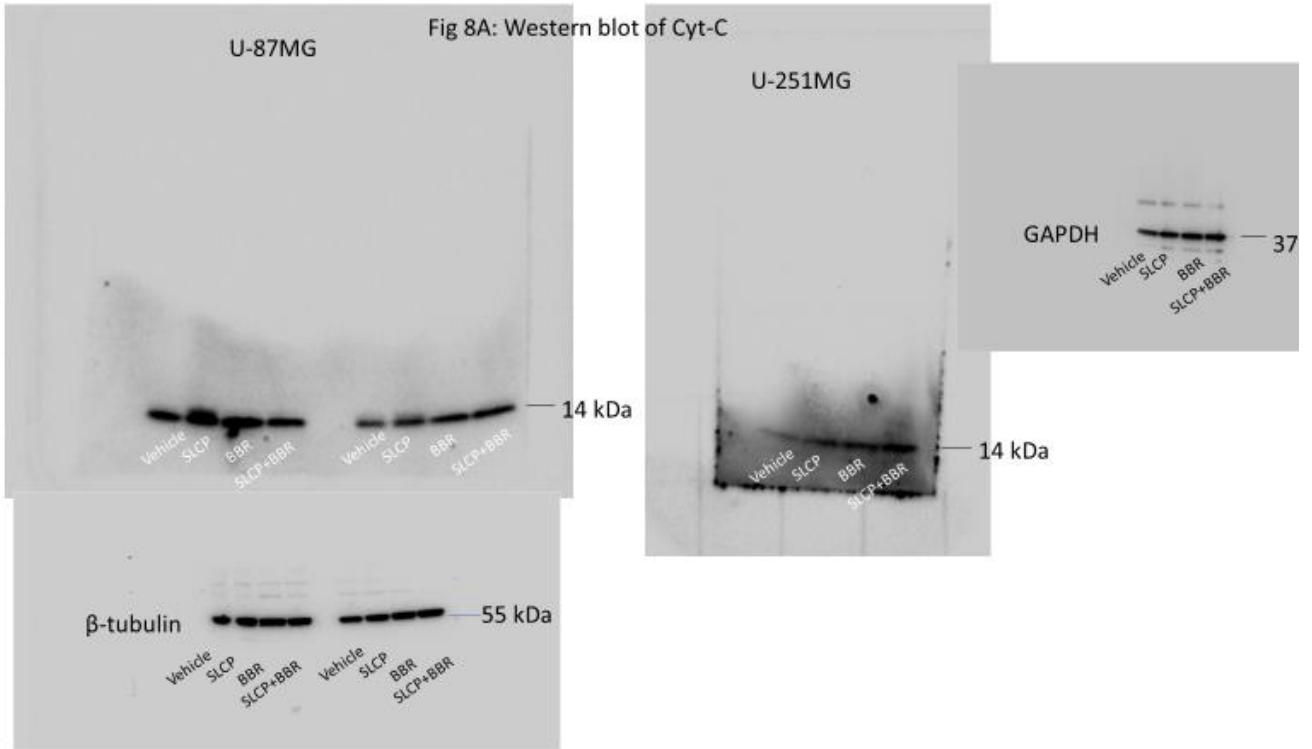

Fig 8A: Western blot of caspase-3

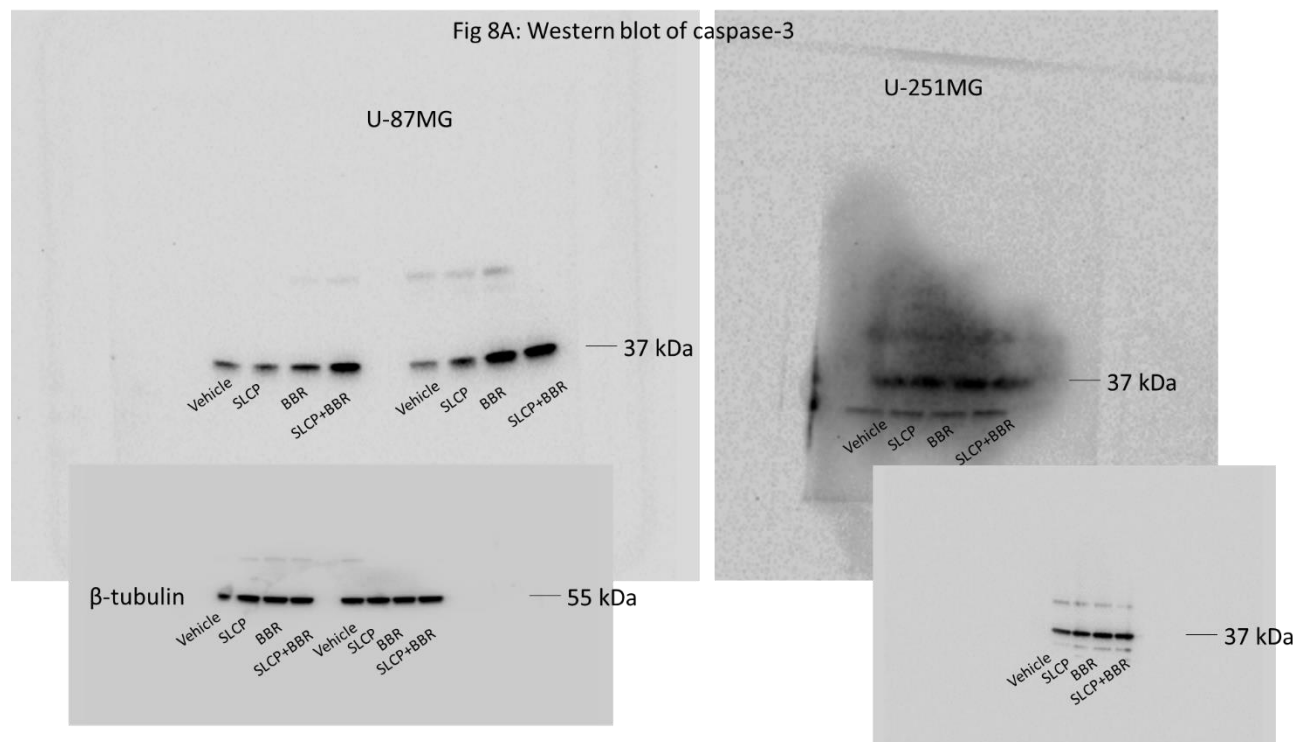

Fig 9A: Western blot of c-Myc

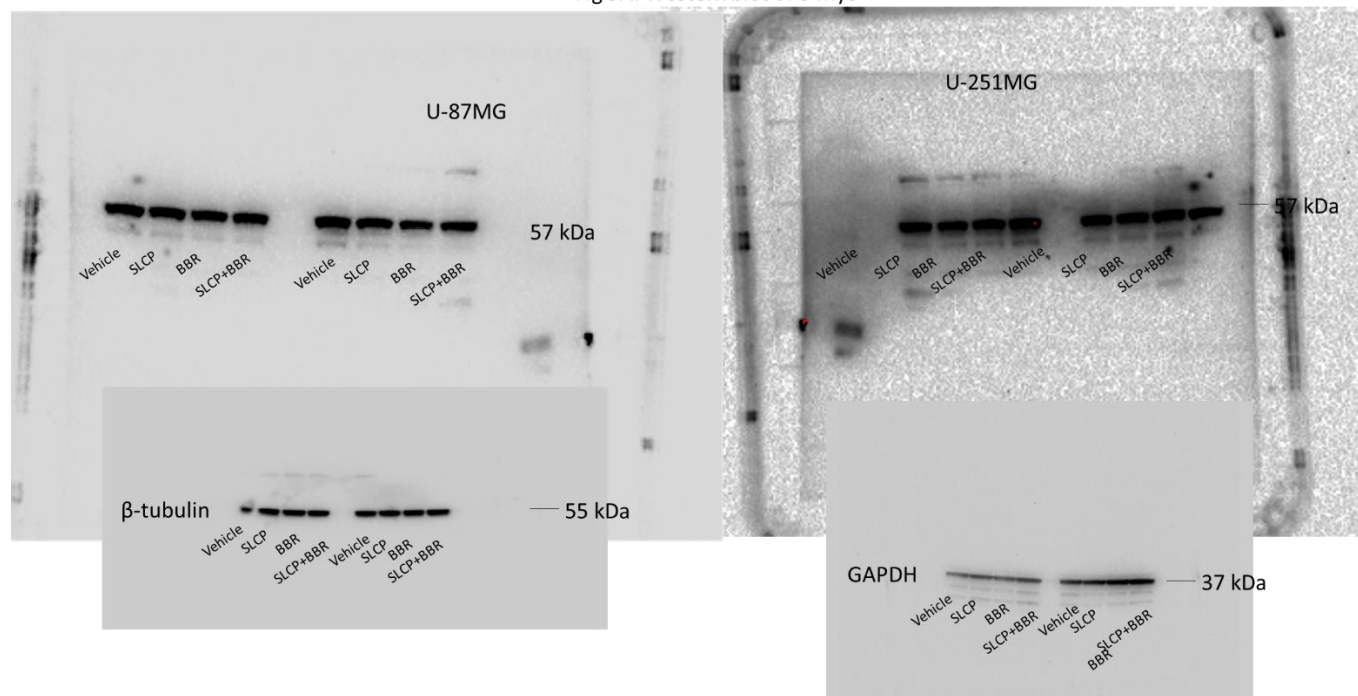

Fig 9A: Western blot of p53

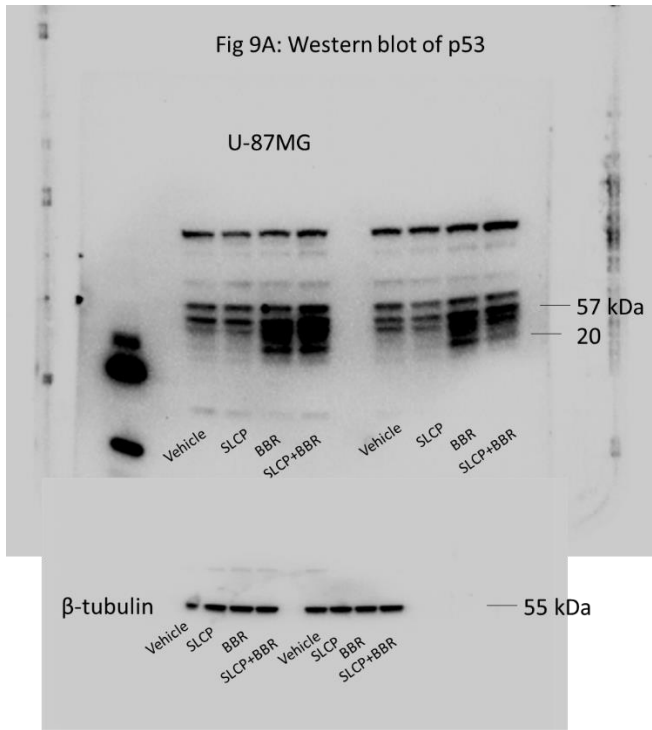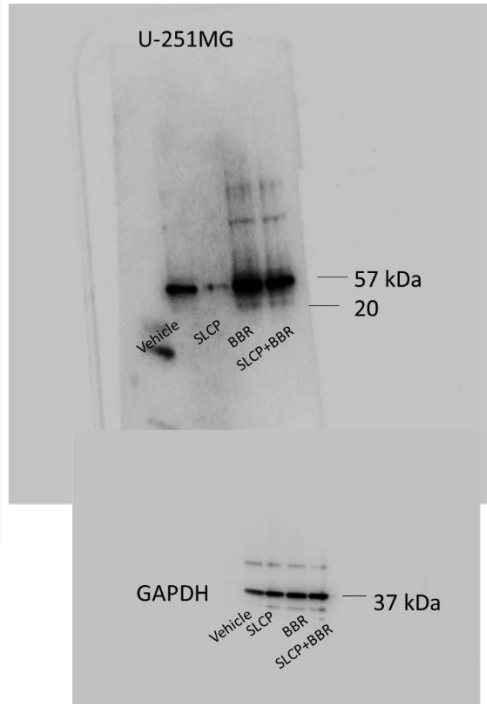

Fig 10A: Western blot of p-Akt

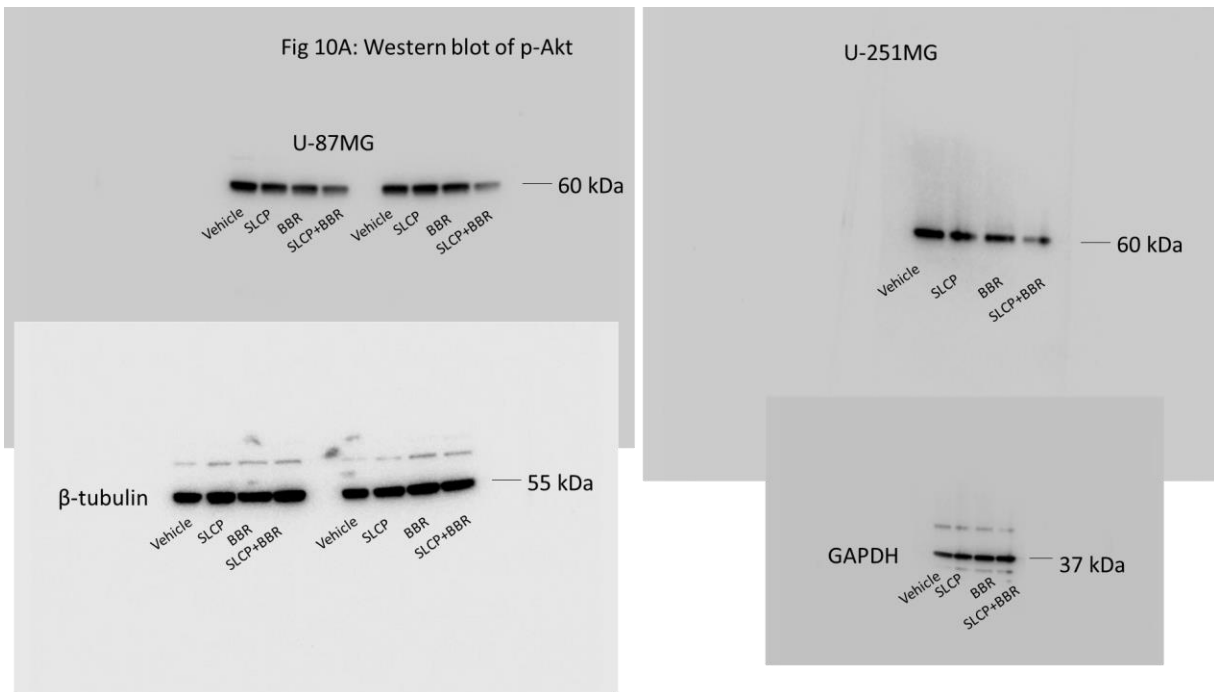



Fig 10A: Western blot of Akt

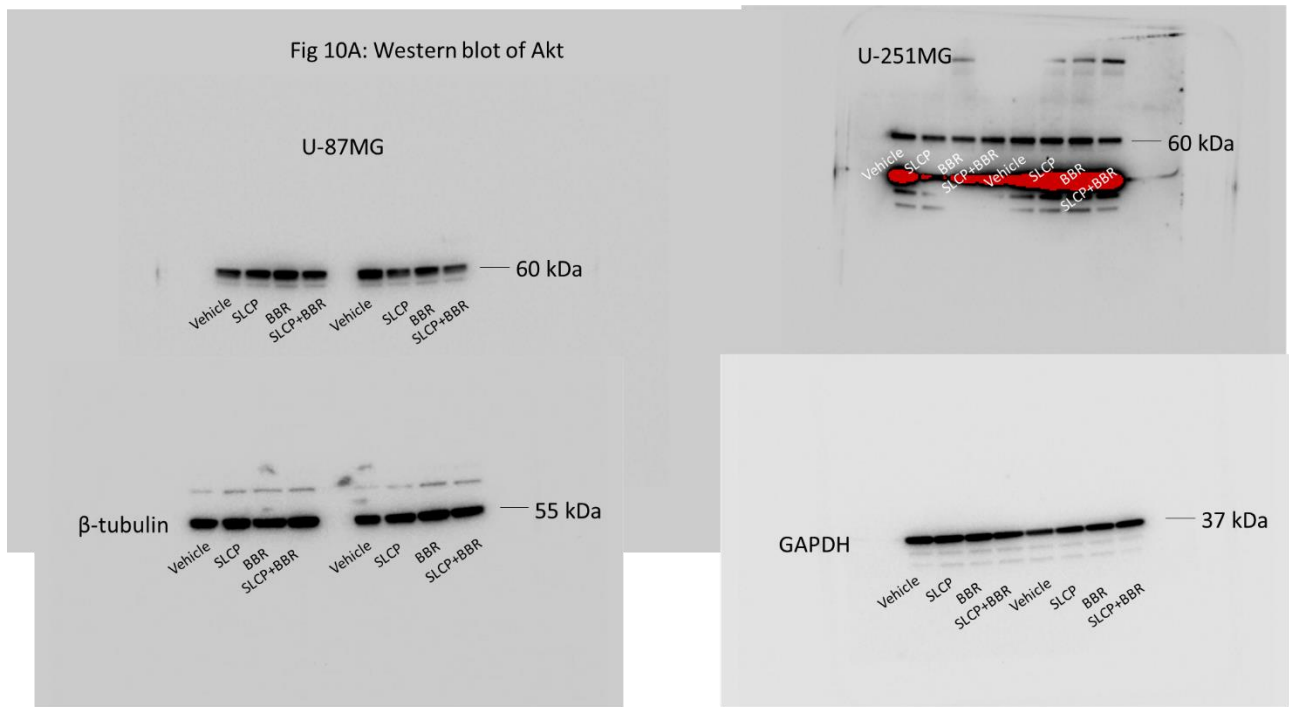

Fig 10A: Western blot of p-PI3K

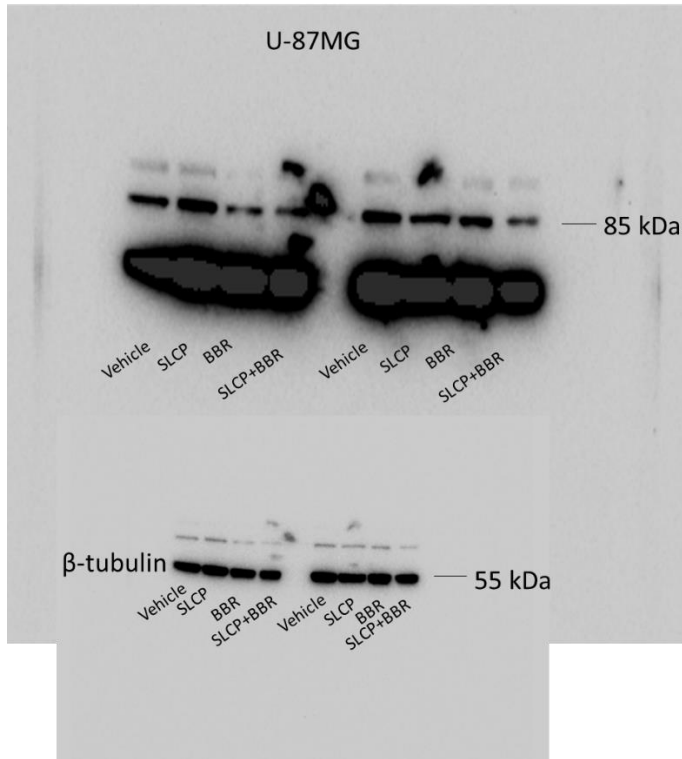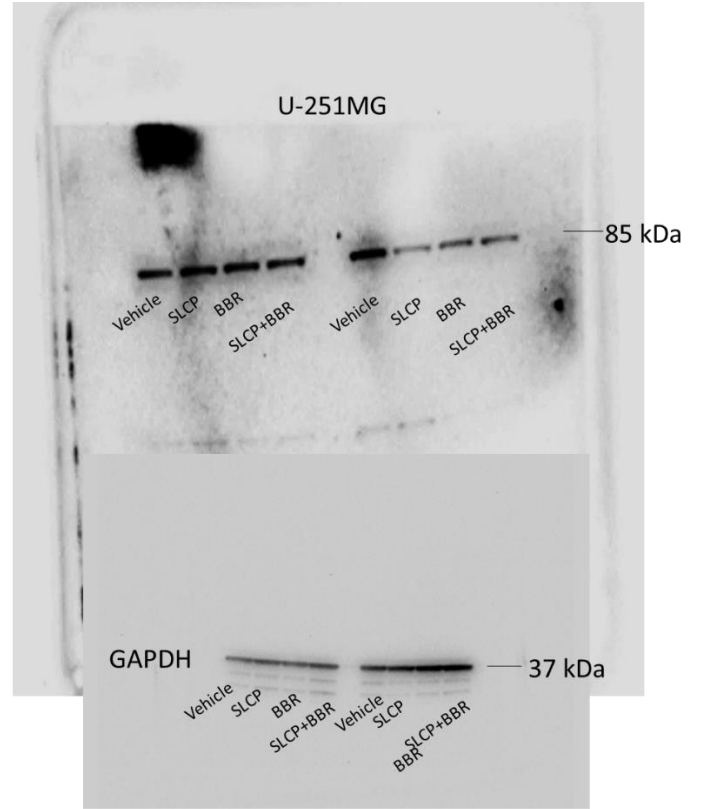

Fig 10A: Western blot of PI3K

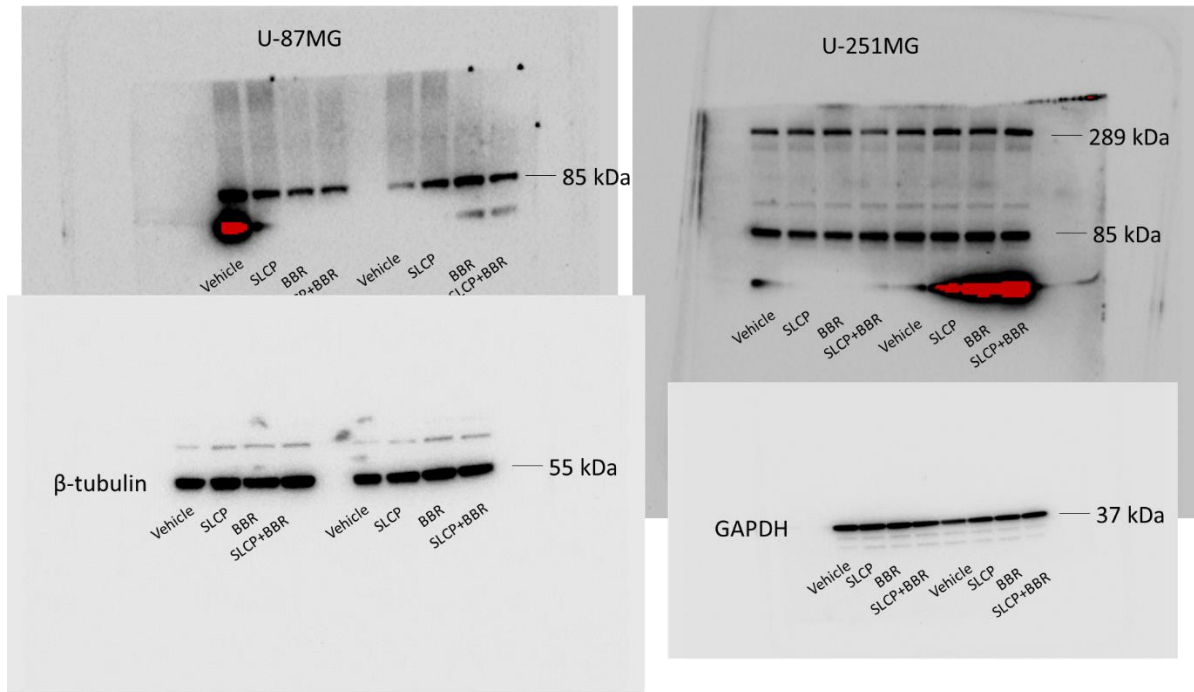

Fig 10A: Western blot of p-mTOR

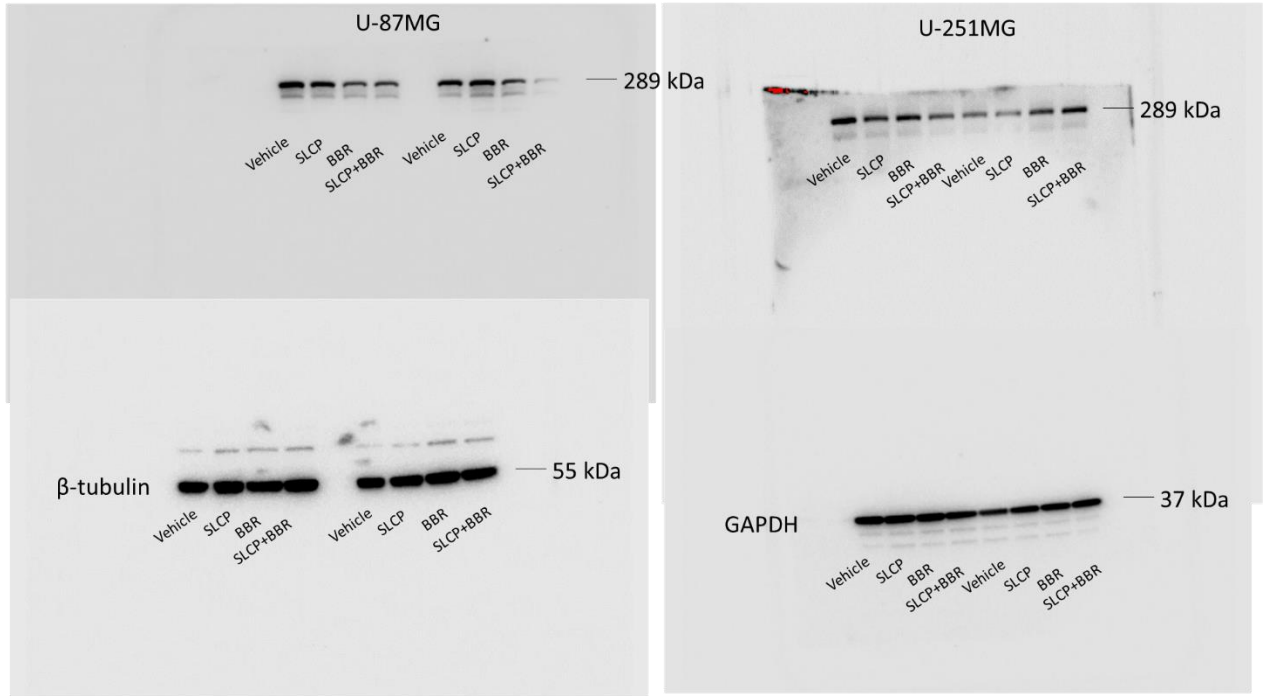

Fig 10A: Western blot of mTOR

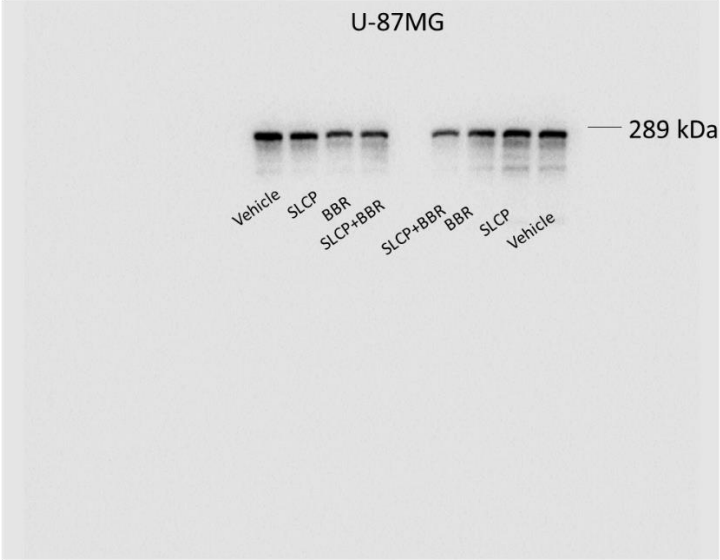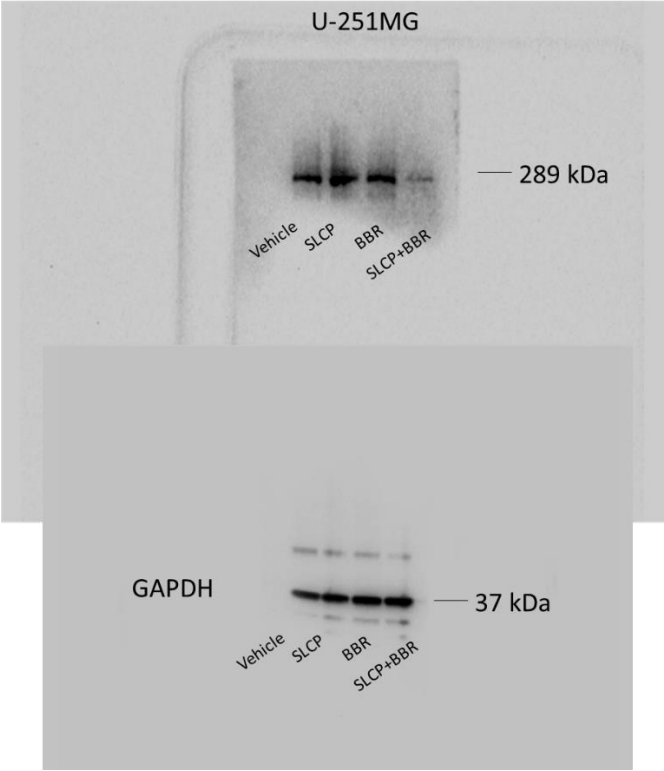

Supplement: pone.0225660.s002.pdf [file pone.0225660.s002.pdf]
